# Supplementary material for: A dansylated peptide for the selective detection of copper ions
Source: Royal Society of Chemistry journal article supplement (doi:10.1039/b208012e), 2002-01-01
Supplement: b208012e.doc [file b208012e.doc]

#
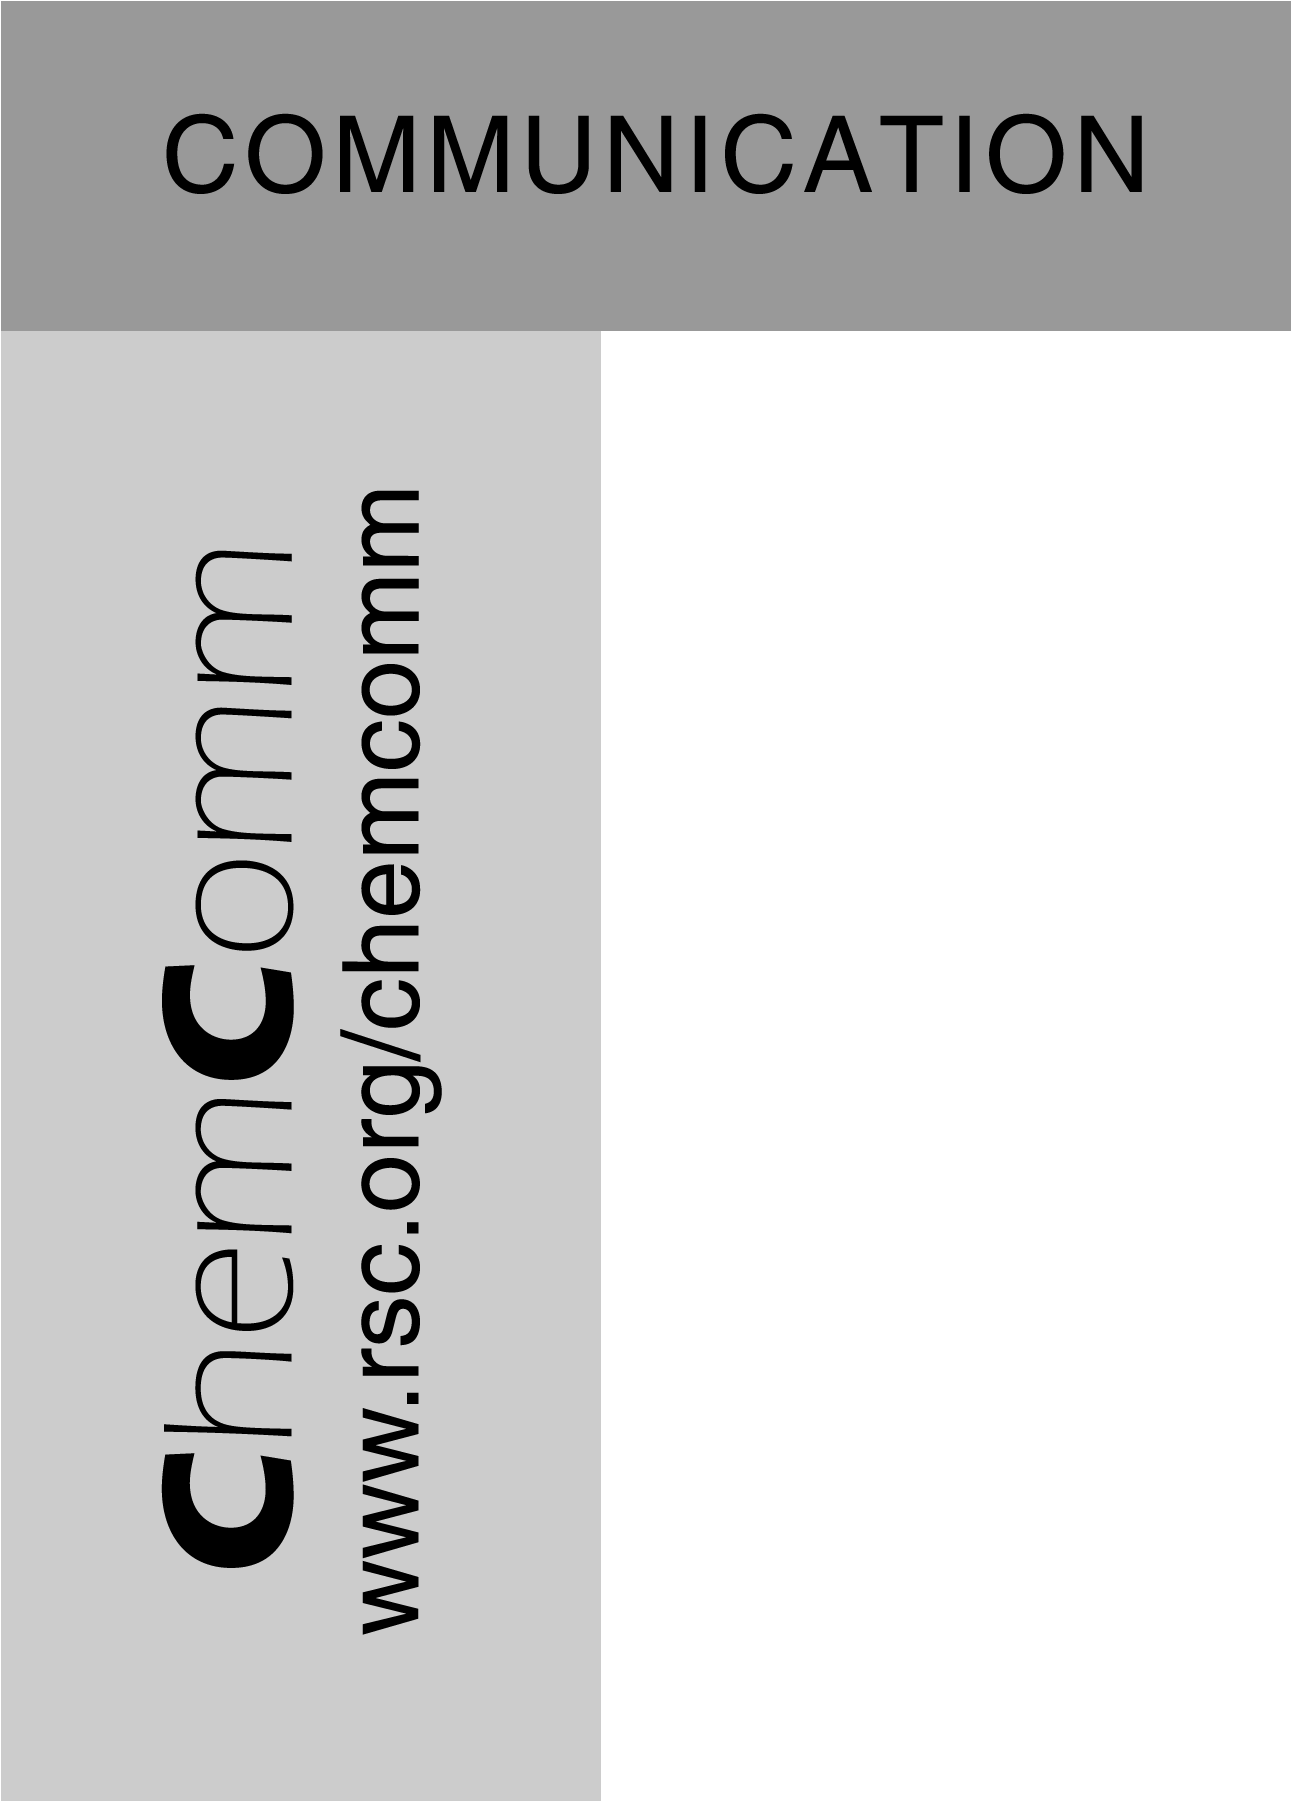
Supplementary Information

A Dansylated Peptide for the Selective Detection of Copper Ions

Yujun Zheng, Kerim Gattás-Asfura, Veeranjaneyulu Konka, Roger M. Leblanc*

# *Experimental Section:*

*Peptide synthesis.* Peptide **1** (dansyl-gly-gly-his-gly) was synthesized by following standard solid phase 9-fluorenylmethoxycarbonyl (Fmoc) chemistry.Diisopropylcarbodiimide (DIC) and 1-hydroxylbenzotriazole (HOBt) *in situ* activation method was used for the coupling reactions. N-terminal dansylation was done with 2 equivalent of dansyl chloride in presence of 2 equivalent of triethylamine in 0.5 h. Cleavage of the peptide from the resin was completed with CF3COOH/H2O (95/5, v/v) for 2.5 h. Following suction under reduced pressure and removal of TFA with N2 blow-off, crude product was precipitated from cold ether. The solid precipitate was centrifuged and washed with ether and lyophilized under vacuum. Semi-preparative RP-HPLC was performed on Waters 2690 separations module. Two solutions were prepared: A: 0.1% TFA in water, B: 0.1% TFA in acetonitrile. A linear gradient (0~30% B within 30 min, flow rate was 2 mL/min) was used. Column conditions: 7.8 x 300 mm, C18 column.

*Peptide analysis.* Analytical HPLC was conducted on a small-scale column (4.6 x 75 mm C18 column). Same gradient as the semi-preparative method was used. Flow rate was 1 mL/min. 1H-NMR data were taken on a Bruker 300 MHz spectrometer. Low resolution FAB was recorded on a VG-Trio 2000 mass spectrometer. High resolution FAB was conducted on a 70-4F instrument in the Mass Spectrometry Lab at University of Illinois at Urbana-Champaign. **1**. 1H-NMR (300 MHz, DMSO-d6):  = 8.92 (s, 1H), 8.55 (d, 1H), 8.41 (d, 1H), 8.24 (t, 1H), 7.64 (m, 2H), 7.40 (s, 1H), 7.29 (m, 1H), 4.80 (m, 1H), 3.86 (m, 2H), 3.77 (m, 2H), 3.57 (m, 2H), 3.35-3.02 (m, 2H), 2.88 (s, 6H), FAB-MS: 560.1925 (MH+, calcd 560.1927).

UV-Vis spectra were recorded at pH 6.8 on a Lambda 900 UV/VIS/NIR spectrometer (Perkin-Elmer, Inc., Shelton, CT). The fluorescence measurements were performed on a Spex Fluorolog 1680 0.22-m double beam spectrometer (Spex Industries, Inc., Edison, NJ). Phosphate buffer solutions were prepared according to CRC handbook page **8**-36 (72nd Ed. 1991-1992, D. R. Lide Ed., CRC Press). In the pH titration experiments, pH values of the solution were adjusted with NaOH and HCl solutions that contained the same concentration of the analytes.
